# Supplementary material for: Evaluation of phosphorus sources in tomato plants inoculated with plant growth-promoting rhizobacteria
Source: PeerJ. 2026 Feb 16;14:e20651. doi: 10.7717/peerj.20651 (PMC12919321; doi:10.7717/peerj.20651)
Supplement: Supplemental Information 2 [file peerj-14-20651-s002.xlsx]

## Sheet: Plant height
			7 DAI						28 DAI
Psource	Treatment	Strain	Y			Psource	Treatment	Strain	Y
P	T1	n/s	20.6			P	T1	n/s	26
P	T1	n/s	20.9			P	T1	n/s	38.5
P	T1	n/s	25.5			P	T1	n/s	34.5
P	T1	n/s	17.7			P	T1	n/s	26.5
P	T1	n/s	23.9			P	T1	n/s	35
P	T1	n/s	24.2			P	T1	n/s	35.2
P	T1	n/s	23.8			P	T1	n/s	34.4
P	T1	n/s	19.4			P	T1	n/s	43.2
P	T1	n/s	19			P	T1	n/s	37
P	T1	n/s	16.5			P	T1	n/s	35.2
P	T2	BSP	21.1			P	T2	BSP	28
P	T2	BSP	23			P	T2	BSP	32
P	T2	BSP	18.4			P	T2	BSP	34.2
P	T2	BSP	21.8			P	T2	BSP	36.5
P	T2	BSP	19.7			P	T2	BSP	34.7
P	T2	BSP	20.4			P	T2	BSP	37.5
P	T2	BSP	19.6			P	T2	BSP	37.8
P	T2	BSP	22.1			P	T2	BSP	34.4
P	T2	BSP	20.8			P	T2	BSP	36.1
P	T2	BSP	21.9			P	T2	BSP	31.4
P	T3	JN24	15.7			P	T3	JN24	33
P	T3	JN24	19.7			P	T3	JN24	32.5
P	T3	JN24	23.2			P	T3	JN24	35.1
P	T3	JN24	21.8			P	T3	JN24	36.1
P	T3	JN24	19.6			P	T3	JN24	32
P	T3	JN24	17.7			P	T3	JN24	36
P	T3	JN24	19.3			P	T3	JN24	34.5
P	T3	JN24	15.4			P	T3	JN24	26
P	T3	JN24	21.4			P	T3	JN24	35.5
P	T3	JN24	19.5			P	T3	JN24	35
P	T4	JLB4	18.3			P	T4	JLB4	34.6
P	T4	JLB4	20.1			P	T4	JLB4	42
P	T4	JLB4	19.2			P	T4	JLB4	44
P	T4	JLB4	22.4			P	T4	JLB4	46
P	T4	JLB4	22.8			P	T4	JLB4	38.9
P	T4	JLB4	20.2			P	T4	JLB4	42
P	T4	JLB4	19.4			P	T4	JLB4	34
P	T4	JLB4	24.4			P	T4	JLB4	38
P	T4	JLB4	25.6			P	T4	JLB4	49
P	T4	JLB4	22.1			P	T4	JLB4	39
PRock	T5	n/s	14.1			PRock	T5	n/s	42.5
PRock	T5	n/s	17			PRock	T5	n/s	37.4
PRock	T5	n/s	17.2			PRock	T5	n/s	37.5
PRock	T5	n/s	18.5			PRock	T5	n/s	38.4
PRock	T5	n/s	17.5			PRock	T5	n/s	43.8
PRock	T5	n/s	19.6			PRock	T5	n/s	43.2
PRock	T5	n/s	14.9			PRock	T5	n/s	39.8
PRock	T5	n/s	17			PRock	T5	n/s	37.6
PRock	T5	n/s	16			PRock	T5	n/s	41.7
PRock	T5	n/s	18.5			PRock	T5	n/s	34.8
PRock	T6	BSP	14.4			PRock	T6	BSP	38.6
PRock	T6	BSP	15.5			PRock	T6	BSP	37
PRock	T6	BSP	17.7			PRock	T6	BSP	39
PRock	T6	BSP	16			PRock	T6	BSP	35.6
PRock	T6	BSP	20.1			PRock	T6	BSP	40.5
PRock	T6	BSP	25.2			PRock	T6	BSP	34.3
PRock	T6	BSP	18.8			PRock	T6	BSP	42
PRock	T6	BSP	18.9			PRock	T6	BSP	34.2
PRock	T6	BSP	17.5			PRock	T6	BSP	38.5
PRock	T6	BSP	16			PRock	T6	BSP	37.5
PRock	T7	JN24	15.9			PRock	T7	JN24	40.5
PRock	T7	JN24	20.5			PRock	T7	JN24	35.4
PRock	T7	JN24	15.5			PRock	T7	JN24	44
PRock	T7	JN24	16.4			PRock	T7	JN24	43
PRock	T7	JN24	14.9			PRock	T7	JN24	42
PRock	T7	JN24	22			PRock	T7	JN24	37.6
PRock	T7	JN24	25.7			PRock	T7	JN24	43.9
PRock	T7	JN24	18.5			PRock	T7	JN24	41
PRock	T7	JN24	19			PRock	T7	JN24	33.4
PRock	T7	JN24	22			PRock	T7	JN24	42.7
PRock	T8	JLB4	14.9			PRock	T8	JLB4	31.5
PRock	T8	JLB4	17			PRock	T8	JLB4	41.5
PRock	T8	JLB4	17.1			PRock	T8	JLB4	39.5
PRock	T8	JLB4	15.3			PRock	T8	JLB4	42.7
PRock	T8	JLB4	19.8			PRock	T8	JLB4	37
PRock	T8	JLB4	15			PRock	T8	JLB4	37.6
PRock	T8	JLB4	14.3			PRock	T8	JLB4	39.6
PRock	T8	JLB4	19.8			PRock	T8	JLB4	38.2
PRock	T8	JLB4	19.3			PRock	T8	JLB4	38.3
PRock	T8	JLB4	13.8			PRock	T8	JLB4	46.4

## Sheet: Root fresh weight
Psource	Treatment	Strain	Y
P	T1	n/s	9.231
P	T1	n/s	9.027
P	T1	n/s	8.432
P	T1	n/s	6.193
P	T1	n/s	5.617
P	T2	BSP	6.022
P	T2	BSP	5.566
P	T2	BSP	5.471
P	T2	BSP	5.078
P	T2	BSP	4.244
P	T3	JN24	5.651
P	T3	JN24	9.084
P	T3	JN24	5.106
P	T3	JN24	4.905
P	T3	JN24	4.185
P	T4	JLB4	12.893
P	T4	JLB4	16.075
P	T4	JLB4	10.3
P	T4	JLB4	10.267
P	T4	JLB4	9.788
PRock	T5	n/s	7.858
PRock	T5	n/s	7.823
PRock	T5	n/s	7.69
PRock	T5	n/s	7.056
PRock	T5	n/s	9.001
PRock	T6	BSP	5.258
PRock	T6	BSP	8.566
PRock	T6	BSP	8.878
PRock	T6	BSP	9.18
PRock	T6	BSP	9.515
PRock	T7	JN24	5.595
PRock	T7	JN24	6.43
PRock	T7	JN24	6.613
PRock	T7	JN24	8.779
PRock	T7	JN24	6.85425
PRock	T8	JLB4	6.79
PRock	T8	JLB4	8.375
PRock	T8	JLB4	6.676
PRock	T8	JLB4	6.544
PRock	T8	JLB4	8.709

## Sheet: Shoot diameter
			7DAI					28DAI
Psource	Treatment	Strain	Y		Psource	Treatment	Strain	Y
P	T1	n/s	2.7		P	T1	n/s	6.3
P	T1	n/s	2.7		P	T1	n/s	6.8
P	T1	n/s	4		P	T1	n/s	7
P	T1	n/s	4.1		P	T1	n/s	7.6
P	T1	n/s	2.9		P	T1	n/s	7
P	T1	n/s	2.9		P	T1	n/s	7.2
P	T1	n/s	2.7		P	T1	n/s	7.3
P	T1	n/s	3.1		P	T1	n/s	7.7
P	T1	n/s	2.8		P	T1	n/s	7.5
P	T1	n/s	3.2		P	T1	n/s	6.5
P	T2	BSP	2.8		P	T2	BSP	6.3
P	T2	BSP	3.4		P	T2	BSP	6.9
P	T2	BSP	3.2		P	T2	BSP	7.2
P	T2	BSP	3.6		P	T2	BSP	7.4
P	T2	BSP	3.4		P	T2	BSP	6.9
P	T2	BSP	4		P	T2	BSP	7.6
P	T2	BSP	3.2		P	T2	BSP	6.8
P	T2	BSP	3		P	T2	BSP	7.6
P	T2	BSP	2.8		P	T2	BSP	7.4
P	T2	BSP	2.8		P	T2	BSP	6.2
P	T3	JN24	3		P	T3	JN24	6.7
P	T3	JN24	3.2		P	T3	JN24	6.8
P	T3	JN24	2.2		P	T3	JN24	7.6
P	T3	JN24	2.7		P	T3	JN24	7.1
P	T3	JN24	2.3		P	T3	JN24	7
P	T3	JN24	3.2		P	T3	JN24	6.9
P	T3	JN24	2.5		P	T3	JN24	7
P	T3	JN24	3		P	T3	JN24	7.5
P	T3	JN24	3.4		P	T3	JN24	7.4
P	T3	JN24	3.3		P	T3	JN24	7.3
P	T4	JLB4	3.1		P	T4	JLB4	7.8
P	T4	JLB4	3.5		P	T4	JLB4	7.5
P	T4	JLB4	3.5		P	T4	JLB4	7.2
P	T4	JLB4	2.4		P	T4	JLB4	7.1
PRock	T4	JLB4	2.9		PRock	T4	JLB4	7.5
PRock	T4	JLB4	2.3		PRock	T4	JLB4	7.9
PRock	T4	JLB4	2.5		PRock	T4	JLB4	7.7
PRock	T4	JLB4	2.9		PRock	T4	JLB4	7.6
PRock	T4	JLB4	3.3		PRock	T4	JLB4	8.1
PRock	T4	JLB4	3.4		PRock	T4	JLB4	7.5
PRock	T5	n/s	3.1		PRock	T5	n/s	6.1
PRock	T5	n/s	3.1		PRock	T5	n/s	6.5
PRock	T5	n/s	3.8		PRock	T5	n/s	7
PRock	T5	n/s	2.5		PRock	T5	n/s	7.4
PRock	T5	n/s	4.1		PRock	T5	n/s	6.9
PRock	T5	n/s	3.9		PRock	T5	n/s	7.2
PRock	T5	n/s	3.4		PRock	T5	n/s	7.3
PRock	T5	n/s	3.1		PRock	T5	n/s	7
PRock	T5	n/s	3		PRock	T5	n/s	7.4
PRock	T5	n/s	2.7		PRock	T5	n/s	6.7
PRock	T6	BSP	3.4		PRock	T6	BSP	7
PRock	T6	BSP	3.8		PRock	T6	BSP	7.1
PRock	T6	BSP	2.9		PRock	T6	BSP	6.8
PRock	T6	BSP	3.3		PRock	T6	BSP	6
PRock	T6	BSP	2.6		PRock	T6	BSP	6.2
PRock	T6	BSP	3.6		PRock	T6	BSP	6.3
PRock	T6	BSP	3.1		PRock	T6	BSP	6.4
PRock	T6	BSP	3.9		PRock	T6	BSP	7.7
PRock	T6	BSP	3.6		PRock	T6	BSP	7.1
PRock	T6	BSP	3.8		PRock	T6	BSP	7.2
PRock	T7	JN24	2.5		PRock	T7	JN24	6.5
PRock	T7	JN24	3.4		PRock	T7	JN24	6.1
PRock	T7	JN24	3.8		PRock	T7	JN24	7.3
PRock	T7	JN24	3		PRock	T7	JN24	7.1
PRock	T7	JN24	2.7		PRock	T7	JN24	7.5
PRock	T7	JN24	3		PRock	T7	JN24	7.3
PRock	T7	JN24	3.3		PRock	T7	JN24	7.2
PRock	T7	JN24	2.8		PRock	T7	JN24	7
PRock	T7	JN24	3.7		PRock	T7	JN24	6.9
PRock	T7	JN24	3.5		PRock	T7	JN24	7.1
PRock	T8	JLB4	2.9		PRock	T8	JLB4	6.9
PRock	T8	JLB4	3		PRock	T8	JLB4	7.1
PRock	T8	JLB4	3.1		PRock	T8	JLB4	7.8
PRock	T8	JLB4	2.9		PRock	T8	JLB4	7.1
PRock	T8	JLB4	4.2		PRock	T8	JLB4	7.2
PRock	T8	JLB4	3.3		PRock	T8	JLB4	6.8
PRock	T8	JLB4	3.4		PRock	T8	JLB4	6.3
PRock	T8	JLB4	4.2		PRock	T8	JLB4	7.2
PRock	T8	JLB4	3.6		PRock	T8	JLB4	6.7
PRock	T8	JLB4	3.7		PRock	T8	JLB4	6.3

## Sheet: Number of leaves
			7 DAI					21 DAI					28 DAI
Psource	Treatment	Strain	Y		Psource	Treatment	Strain	Y		Psource	Treatment	Strain	Y
P	T1	n/s	17		P	T1	n/s	48		P	T1	n/s	44
P	T1	n/s	12		P	T1	n/s	53		P	T1	n/s	47
P	T1	n/s	28		P	T1	n/s	65		P	T1	n/s	48
P	T1	n/s	39		P	T1	n/s	85		P	T1	n/s	53
P	T1	n/s	18		P	T1	n/s	53		P	T1	n/s	53
P	T1	n/s	13		P	T1	n/s	44		P	T1	n/s	62
P	T1	n/s	30		P	T1	n/s	82		P	T1	n/s	65
P	T1	n/s	16		P	T1	n/s	47		P	T1	n/s	79
P	T1	n/s	25		P	T1	n/s	62		P	T1	n/s	82
P	T1	n/s	22		P	T1	n/s	79		P	T1	n/s	85
P	T2	BSP	24		P	T2	BSP	81		P	T2	BSP	48
P	T2	BSP	16		P	T2	BSP	51		P	T2	BSP	51
P	T2	BSP	19		P	T2	BSP	61		P	T2	BSP	53
P	T2	BSP	25		P	T2	BSP	60		P	T2	BSP	60
P	T2	BSP	22		P	T2	BSP	64		P	T2	BSP	60
P	T2	BSP	23		P	T2	BSP	53		P	T2	BSP	61
P	T2	BSP	20		P	T2	BSP	75		P	T2	BSP	61
P	T2	BSP	17		P	T2	BSP	60		P	T2	BSP	64
P	T2	BSP	16		P	T2	BSP	48		P	T2	BSP	75
P	T2	BSP	16		P	T2	BSP	61		P	T2	BSP	81
P	T3	JN24	15		P	T3	JN24	45		P	T3	JN24	43
P	T3	JN24	32		P	T3	JN24	43		P	T3	JN24	45
P	T3	JN24	15		P	T3	JN24	56		P	T3	JN24	47
P	T3	JN24	19		P	T3	JN24	70		P	T3	JN24	51
P	T3	JN24	14		P	T3	JN24	47		P	T3	JN24	54
P	T3	JN24	15		P	T3	JN24	51		P	T3	JN24	55
P	T3	JN24	10		P	T3	JN24	55		P	T3	JN24	56
P	T3	JN24	19		P	T3	JN24	54		P	T3	JN24	58
P	T3	JN24	20		P	T3	JN24	76		P	T3	JN24	70
P	T3	JN24	19		P	T3	JN24	58		P	T3	JN24	76
P	T4	JLB4	25		P	T4	JLB4	73		P	T4	JLB4	61
P	T4	JLB4	22		P	T4	JLB4	75		P	T4	JLB4	65
P	T4	JLB4	13		P	T4	JLB4	65		P	T4	JLB4	65
P	T4	JLB4	15		P	T4	JLB4	66		P	T4	JLB4	66
P	T4	JLB4	21		P	T4	JLB4	65		P	T4	JLB4	73
P	T4	JLB4	20		P	T4	JLB4	75		P	T4	JLB4	75
P	T4	JLB4	27		P	T4	JLB4	104		P	T4	JLB4	75
P	T4	JLB4	31		P	T4	JLB4	91		P	T4	JLB4	91
P	T4	JLB4	18		P	T4	JLB4	61		P	T4	JLB4	101
P	T4	JLB4	25		P	T4	JLB4	101		P	T4	JLB4	104
PRock	T5	n/s	17		PRock	T5	n/s	49		PRock	T5	n/s	36
PRock	T5	n/s	20		PRock	T5	n/s	47		PRock	T5	n/s	47
PRock	T5	n/s	21		PRock	T5	n/s	36		PRock	T5	n/s	47
PRock	T5	n/s	19		PRock	T5	n/s	54		PRock	T5	n/s	49
PRock	T5	n/s	28		PRock	T5	n/s	58		PRock	T5	n/s	51
PRock	T5	n/s	20		PRock	T5	n/s	51		PRock	T5	n/s	52
PRock	T5	n/s	22		PRock	T5	n/s	56		PRock	T5	n/s	54
PRock	T5	n/s	17		PRock	T5	n/s	54		PRock	T5	n/s	54
PRock	T5	n/s	19		PRock	T5	n/s	52		PRock	T5	n/s	56
PRock	T5	n/s	22		PRock	T5	n/s	47		PRock	T5	n/s	58
PRock	T6	BSP	18		PRock	T6	BSP	51		PRock	T6	BSP	41
PRock	T6	BSP	28		PRock	T6	BSP	70		PRock	T6	BSP	43
PRock	T6	BSP	18		PRock	T6	BSP	56		PRock	T6	BSP	45
PRock	T6	BSP	21		PRock	T6	BSP	58		PRock	T6	BSP	46
PRock	T6	BSP	17		PRock	T6	BSP	45		PRock	T6	BSP	49
PRock	T6	BSP	18		PRock	T6	BSP	43		PRock	T6	BSP	51
PRock	T6	BSP	17		PRock	T6	BSP	56		PRock	T6	BSP	56
PRock	T6	BSP	19		PRock	T6	BSP	49		PRock	T6	BSP	56
PRock	T6	BSP	20		PRock	T6	BSP	41		PRock	T6	BSP	58
PRock	T6	BSP	22		PRock	T6	BSP	46		PRock	T6	BSP	70
PRock	T7	JN24	13		PRock	T7	JN24	47		PRock	T7	JN24	42
PRock	T7	JN24	23		PRock	T7	JN24	60		PRock	T7	JN24	47
PRock	T7	JN24	22		PRock	T7	JN24	60		PRock	T7	JN24	49
PRock	T7	JN24	27		PRock	T7	JN24	65		PRock	T7	JN24	51
PRock	T7	JN24	16		PRock	T7	JN24	51		PRock	T7	JN24	54
PRock	T7	JN24	26		PRock	T7	JN24	54		PRock	T7	JN24	54
PRock	T7	JN24	18		PRock	T7	JN24	42		PRock	T7	JN24	60
PRock	T7	JN24	17		PRock	T7	JN24	49		PRock	T7	JN24	60
PRock	T7	JN24	27		PRock	T7	JN24	64		PRock	T7	JN24	64
PRock	T7	JN24	22		PRock	T7	JN24	54		PRock	T7	JN24	65
PRock	T8	JLB4	16		PRock	T8	JLB4	53		PRock	T8	JLB4	43
PRock	T8	JLB4	17		PRock	T8	JLB4	48		PRock	T8	JLB4	47
PRock	T8	JLB4	19		PRock	T8	JLB4	67		PRock	T8	JLB4	48
PRock	T8	JLB4	24		PRock	T8	JLB4	58		PRock	T8	JLB4	49
PRock	T8	JLB4	30		PRock	T8	JLB4	61		PRock	T8	JLB4	53
PRock	T8	JLB4	15		PRock	T8	JLB4	43		PRock	T8	JLB4	54
PRock	T8	JLB4	16		PRock	T8	JLB4	47		PRock	T8	JLB4	58
PRock	T8	JLB4	21		PRock	T8	JLB4	54		PRock	T8	JLB4	61
PRock	T8	JLB4	20		PRock	T8	JLB4	73		PRock	T8	JLB4	67
PRock	T8	JLB4	21		PRock	T8	JLB4	49		PRock	T8	JLB4	73

## Sheet: Leaf area
			28 DAI
Psource	Treatment	Strain	Y
P	T1	n/s	597.26
P	T1	n/s	596.66
P	T1	n/s	811.12
P	T1	n/s	586.47
P	T2	BSP	933.46
P	T2	BSP	761.08
P	T2	BSP	796.9
P	T2	BSP	956.58
P	T3	JN24	500
P	T3	JN24	678.84
P	T3	JN24	560.95
P	T3	JN24	529.25
P	T4	JLB4	1091.33
P	T4	JLB4	848.92
P	T4	JLB4	983.88
P	T4	JLB4	902.79
PRock	T5	n/s	649.65
PRock	T5	n/s	705.56
PRock	T5	n/s	727.02
PRock	T5	n/s	698.07
PRock	T6	BSP	746.39
PRock	T6	BSP	667.81
PRock	T6	BSP	629.73
PRock	T6	BSP	713.75
PRock	T7	JN24	673.2
PRock	T7	JN24	565.27
PRock	T7	JN24	639.17
PRock	T7	JN24	603.37
PRock	T8	JLB4	604.75
PRock	T8	JLB4	766.84
PRock	T8	JLB4	700.57
PRock	T8	JLB4	636.63

## Sheet: Chlorophyll
Psource	Treatment	Strain	Chlorophyll A	Chlorophyll B	Carotenoids
P	T1	n/s	7.5575	2.51177	2.79038
P	T1	n/s	4.65338	1.7358	2.01643
P	T1	n/s	5.04328	1.71381	1.76421
P	T1	n/s	6.20472	1.8811	1.9019
P	T2	BSP	4.60314	1.22995	1.20127
P	T2	BSP	6.25501	2.77946	1.40609
P	T2	BSP	8.513	2.48006	2.22551
P	T2	BSP	6.42171	2.76294	2.02024
P	T3	JN24	5.1154	1.44379	1.36787
P	T3	JN24	6.43961	2.08025	1.90766
P	T3	JN24	6.25597	1.79875	1.8282
P	T3	JN24	8.2772	2.35044	2.47475
P	T4	JLB4	1.94883	0.25235	4.20908
P	T4	JLB4	13.0676	4.40545	3.43366
P	T4	JLB4	9.90126	2.8641	2.58017
P	T4	JLB4	7.88723	2.23009	2.13153
PRock	T5	n/s	4.28172	1.05462	1.4886
PRock	T5	n/s	4.44321	1.13179	1.31307
PRock	T5	n/s	7.03158	2.15311	1.92599
PRock	T5	n/s	5.14107	1.40666	1.52904
PRock	T6	BSP	5.41756	1.76747	1.66247
PRock	T6	BSP	5.75202	2.11025	1.77635
PRock	T6	BSP	6.09451	1.99817	1.77739
PRock	T6	BSP	5.8613	2.31288	1.64642
PRock	T7	JN24	4.00559	1.36076	1.17332
PRock	T7	JN24	3.91049	1.38815	1.05335
PRock	T7	JN24	3.38704	1.18914	1.00472
PRock	T7	JN24	3.2781	1.49279	1.44857
PRock	T8	JLB4	3.65283	1.0073	1.22026
PRock	T8	JLB4	4.53178	2.4942	3.09796
PRock	T8	JLB4	3.99567	1.03541	1.31009
PRock	T8	JLB4	5.15533	1.41293	1.57975

## Sheet: Leaf greeness
			7DAI				14DAI				21DAI				28DAI
Psource	Treatment	Strain	Y	Psource	Treatment	Strain	Y	Psource	Treatment	Strain	Y	Psource	Treatment	Strain	Y
Fos	T1	n/s	35.7	Fos	T1	n/s	51.2	Fos	T1	n/s	48.9	Fos	T1	n/s	49.5
Fos	T1	n/s	38.6	Fos	T1	n/s	45.7	Fos	T1	n/s	45.8	Fos	T1	n/s	52
Fos	T1	n/s	38.5	Fos	T1	n/s	50	Fos	T1	n/s	46.5	Fos	T1	n/s	52.9
Fos	T1	n/s	37	Fos	T1	n/s	42	Fos	T1	n/s	42.5	Fos	T1	n/s	51
Fos	T1	n/s	34.2	Fos	T1	n/s	48	Fos	T1	n/s	48.5	Fos	T1	n/s	44
Fos	T1	n/s	38.7	Fos	T1	n/s	47.8	Fos	T1	n/s	49.2	Fos	T1	n/s	42.1
Fos	T1	n/s	34.2	Fos	T1	n/s	50.4	Fos	T1	n/s	43.8	Fos	T1	n/s	52.2
Fos	T1	n/s	35.5	Fos	T1	n/s	46.1	Fos	T1	n/s	50	Fos	T1	n/s	52.5
Fos	T1	n/s	36.3	Fos	T1	n/s	15.4	Fos	T1	n/s	48.9	Fos	T1	n/s	47.1
Fos	T1	n/s	36	Fos	T1	n/s	47.5	Fos	T1	n/s	43.8	Fos	T1	n/s	46.6
Fos	T2	BSP	31.8	Fos	T2	BSP	50	Fos	T2	BSP	47.1	Fos	T2	BSP	48.5
Fos	T2	BSP	37	Fos	T2	BSP	49.7	Fos	T2	BSP	50.1	Fos	T2	BSP	52.7
Fos	T2	BSP	38.7	Fos	T2	BSP	48.1	Fos	T2	BSP	53.3	Fos	T2	BSP	39.7
Fos	T2	BSP	39.7	Fos	T2	BSP	53.5	Fos	T2	BSP	50.3	Fos	T2	BSP	49
Fos	T2	BSP	38	Fos	T2	BSP	48.8	Fos	T2	BSP	47	Fos	T2	BSP	45.1
Fos	T2	BSP	35.2	Fos	T2	BSP	47.6	Fos	T2	BSP	49.5	Fos	T2	BSP	48.1
Fos	T2	BSP	35.5	Fos	T2	BSP	43.6	Fos	T2	BSP	49.1	Fos	T2	BSP	36.8
Fos	T2	BSP	35.2	Fos	T2	BSP	40.7	Fos	T2	BSP	52.3	Fos	T2	BSP	33.9
Fos	T2	BSP	36.3	Fos	T2	BSP	42.6	Fos	T2	BSP	52.6	Fos	T2	BSP	44.5
Fos	T2	BSP	34.6	Fos	T2	BSP	41.9	Fos	T2	BSP	49.8	Fos	T2	BSP	46.1
Fos	T3	JN24	39.5	Fos	T3	JN24	51.3	Fos	T3	JN24	54.4	Fos	T3	JN24	53.4
Fos	T3	JN24	38.7	Fos	T3	JN24	50.3	Fos	T3	JN24	51.9	Fos	T3	JN24	45.1
Fos	T3	JN24	35.3	Fos	T3	JN24	47.1	Fos	T3	JN24	51.5	Fos	T3	JN24	41.3
Fos	T3	JN24	34.6	Fos	T3	JN24	46.4	Fos	T3	JN24	51.9	Fos	T3	JN24	42.8
Fos	T3	JN24	35.2	Fos	T3	JN24	42.9	Fos	T3	JN24	49.5	Fos	T3	JN24	42.6
Fos	T3	JN24	35.5	Fos	T3	JN24	49.8	Fos	T3	JN24	51	Fos	T3	JN24	42.4
Fos	T3	JN24	35	Fos	T3	JN24	42.9	Fos	T3	JN24	47	Fos	T3	JN24	40
Fos	T3	JN24	37.5	Fos	T3	JN24	43.5	Fos	T3	JN24	47.1	Fos	T3	JN24	46.1
Fos	T3	JN24	39.5	Fos	T3	JN24	41.6	Fos	T3	JN24	48.3	Fos	T3	JN24	49.8
Fos	T3	JN24	36	Fos	T3	JN24	42.1	Fos	T3	JN24	49.7	Fos	T3	JN24	40
Fos	T4	JLB4	41.9	Fos	T4	JLB4	52.4	Fos	T4	JLB4	47.5	Fos	T4	JLB4	53.8
Fos	T4	JLB4	37	Fos	T4	JLB4	50	Fos	T4	JLB4	50.4	Fos	T4	JLB4	51.5
Fos	T4	JLB4	37.5	Fos	T4	JLB4	50.6	Fos	T4	JLB4	52	Fos	T4	JLB4	47.2
Fos	T4	JLB4	37.4	Fos	T4	JLB4	47.1	Fos	T4	JLB4	51.7	Fos	T4	JLB4	53.1
Fos	T4	JLB4	37.7	Fos	T4	JLB4	49.8	Fos	T4	JLB4	52.8	Fos	T4	JLB4	49.8
Fos	T4	JLB4	36.1	Fos	T4	JLB4	40.9	Fos	T4	JLB4	42.3	Fos	T4	JLB4	50.2
Fos	T4	JLB4	36.1	Fos	T4	JLB4	41.2	Fos	T4	JLB4	47.7	Fos	T4	JLB4	46.7
Fos	T4	JLB4	37.6	Fos	T4	JLB4	43.8	Fos	T4	JLB4	51.2	Fos	T4	JLB4	38.4
Fos	T4	JLB4	35.4	Fos	T4	JLB4	43.9	Fos	T4	JLB4	50.3	Fos	T4	JLB4	43.3
Fos	T4	JLB4	36.9	Fos	T4	JLB4	41.1	Fos	T4	JLB4	52.4	Fos	T4	JLB4	53.6
Rfos	T5	n/s	37.9	Rfos	T5	n/s	48.8	Rfos	T5	n/s	53.4	Rfos	T5	n/s	56.5
Rfos	T5	n/s	36.9	Rfos	T5	n/s	43.4	Rfos	T5	n/s	54.1	Rfos	T5	n/s	54.5
Rfos	T5	n/s	37.1	Rfos	T5	n/s	46	Rfos	T5	n/s	40.4	Rfos	T5	n/s	50.1
Rfos	T5	n/s	33.7	Rfos	T5	n/s	43.6	Rfos	T5	n/s	50.3	Rfos	T5	n/s	49.3
Rfos	T5	n/s	39.1	Rfos	T5	n/s	50.7	Rfos	T5	n/s	55.3	Rfos	T5	n/s	58.7
Rfos	T5	n/s	36.9	Rfos	T5	n/s	52.2	Rfos	T5	n/s	51.7	Rfos	T5	n/s	54.6
Rfos	T5	n/s	37.4	Rfos	T5	n/s	50.8	Rfos	T5	n/s	51.5	Rfos	T5	n/s	58.1
Rfos	T5	n/s	37.2	Rfos	T5	n/s	48.8	Rfos	T5	n/s	54.1	Rfos	T5	n/s	52.4
Rfos	T5	n/s	39.8	Rfos	T5	n/s	47.3	Rfos	T5	n/s	52.3	Rfos	T5	n/s	55.7
Rfos	T5	n/s	39.2	Rfos	T5	n/s	55.4	Rfos	T5	n/s	55	Rfos	T5	n/s	58.1
Rfos	T6	BSP	37.6	Rfos	T6	BSP	47.3	Rfos	T6	BSP	54.9	Rfos	T6	BSP	57.5
Rfos	T6	BSP	39.3	Rfos	T6	BSP	48.3	Rfos	T6	BSP	53.9	Rfos	T6	BSP	53.8
Rfos	T6	BSP	35.1	Rfos	T6	BSP	43.1	Rfos	T6	BSP	50.9	Rfos	T6	BSP	50.2
Rfos	T6	BSP	37.5	Rfos	T6	BSP	47.2	Rfos	T6	BSP	51.7	Rfos	T6	BSP	52.5
Rfos	T6	BSP	38.5	Rfos	T6	BSP	47.5	Rfos	T6	BSP	51.2	Rfos	T6	BSP	55.7
Rfos	T6	BSP	37.9	Rfos	T6	BSP	51.1	Rfos	T6	BSP	52.1	Rfos	T6	BSP	53.8
Rfos	T6	BSP	37.9	Rfos	T6	BSP	48.9	Rfos	T6	BSP	52.9	Rfos	T6	BSP	53.2
Rfos	T6	BSP	40.1	Rfos	T6	BSP	54.4	Rfos	T6	BSP	51.3	Rfos	T6	BSP	55.1
Rfos	T6	BSP	41.2	Rfos	T6	BSP	48.6	Rfos	T6	BSP	55.1	Rfos	T6	BSP	53.9
Rfos	T6	BSP	40.9	Rfos	T6	BSP	54	Rfos	T6	BSP	52.4	Rfos	T6	BSP	56.6
Rfos	T7	JN24	41.2	Rfos	T7	JN24	42.7	Rfos	T7	JN24	47.7	Rfos	T7	JN24	53.8
Rfos	T7	JN24	40.9	Rfos	T7	JN24	47.7	Rfos	T7	JN24	51.6	Rfos	T7	JN24	54.4
Rfos	T7	JN24	40.1	Rfos	T7	JN24	48.3	Rfos	T7	JN24	55.2	Rfos	T7	JN24	50.6
Rfos	T7	JN24	40.3	Rfos	T7	JN24	48	Rfos	T7	JN24	53.1	Rfos	T7	JN24	53.4
Rfos	T7	JN24	38.1	Rfos	T7	JN24	43.8	Rfos	T7	JN24	51.5	Rfos	T7	JN24	53
Rfos	T7	JN24	39.3	Rfos	T7	JN24	47.4	Rfos	T7	JN24	50.7	Rfos	T7	JN24	52.2
Rfos	T7	JN24	38	Rfos	T7	JN24	50.9	Rfos	T7	JN24	51.2	Rfos	T7	JN24	51.8
Rfos	T7	JN24	39.2	Rfos	T7	JN24	45.2	Rfos	T7	JN24	50	Rfos	T7	JN24	52.4
Rfos	T7	JN24	38.3	Rfos	T7	JN24	48.4	Rfos	T7	JN24	51	Rfos	T7	JN24	44.5
Rfos	T7	JN24	39.7	Rfos	T7	JN24	51.4	Rfos	T7	JN24	54.3	Rfos	T7	JN24	58.7
Rfos	T8	JLB4	35.1	Rfos	T8	JLB4	46.8	Rfos	T8	JLB4	50.1	Rfos	T8	JLB4	50.3
Rfos	T8	JLB4	39.9	Rfos	T8	JLB4	45.7	Rfos	T8	JLB4	54.1	Rfos	T8	JLB4	54
Rfos	T8	JLB4	36.6	Rfos	T8	JLB4	47.7	Rfos	T8	JLB4	51.8	Rfos	T8	JLB4	54.5
Rfos	T8	JLB4	38.7	Rfos	T8	JLB4	45.6	Rfos	T8	JLB4	53.6	Rfos	T8	JLB4	59.7
Rfos	T8	JLB4	39.8	Rfos	T8	JLB4	49.7	Rfos	T8	JLB4	53.3	Rfos	T8	JLB4	55.6
Rfos	T8	JLB4	39.9	Rfos	T8	JLB4	51.1	Rfos	T8	JLB4	56.7	Rfos	T8	JLB4	53.7
Rfos	T8	JLB4	40.8	Rfos	T8	JLB4	48.9	Rfos	T8	JLB4	52.9	Rfos	T8	JLB4	54.4
Rfos	T8	JLB4	41.4	Rfos	T8	JLB4	50.3	Rfos	T8	JLB4	53.6	Rfos	T8	JLB4	54.6
Rfos	T8	JLB4	40.1	Rfos	T8	JLB4	50.4	Rfos	T8	JLB4	56.3	Rfos	T8	JLB4	53
Rfos	T8	JLB4	40	Rfos	T8	JLB4	49.4	Rfos	T8	JLB4	55.7	Rfos	T8	JLB4	57.9

## Sheet: Aerial fresh weight
Psource	Treatment	Strain	Y
P	T1	n/s	49.49
P	T1	n/s	29.283
P	T1	n/s	43.064
P	T1	n/s	36.711
P	T1	n/s	30.383
P	T1	n/s	37.7862
P	T2	BSP	30.864
P	T2	BSP	37.22
P	T2	BSP	20.201
P	T2	BSP	22.657
P	T2	BSP	25.865
P	T2	BSP	27.89
P	T3	JN24	31.176
P	T3	JN24	22.728
P	T3	JN24	25.299
P	T3	JN24	24.925
P	T3	JN24	18.361
P	T3	JN24	26.468
P	T4	JLB4	47.229
P	T4	JLB4	53.818
P	T4	JLB4	41.941
P	T4	JLB4	56.074
P	T4	JLB4	54.866
P	T4	JLB4	50.7856
PRock	T5	n/s	49.27
PRock	T5	n/s	35.764
PRock	T5	n/s	37.983
PRock	T5	n/s	40.8
PRock	T5	n/s	36.808
PRock	T5	n/s	36.781
PRock	T6	BSP	34.75
PRock	T6	BSP	32.187
PRock	T6	BSP	32.954
PRock	T6	BSP	34.19
PRock	T6	BSP	36.67
PRock	T6	BSP	34.1502
PRock	T7	JN24	34.001
PRock	T7	JN24	35.986
PRock	T7	JN24	33.416
PRock	T7	JN24	26.194
PRock	T7	JN24	32.3993
PRock	T7	JN24	32.3993
PRock	T8	JLB4	19.253
PRock	T8	JLB4	36.033
PRock	T8	JLB4	31.647
PRock	T8	JLB4	34.113
PRock	T8	JLB4	31.986
PRock	T8	JLB4	29.539

## Sheet: Aerial dry weight
Psource	Treatment	Strain	Y
P	T1	n/s	5.1
P	T1	n/s	5.72
P	T1	n/s	7.42
P	T1	n/s	2.66
P	T1	n/s	3.88
P	T1	n/s	3.74
P	T1	n/s	6.68
P	T1	n/s	3.26
P	T1	n/s	2.5
P	T1	n/s	6.72
P	T2	BSP	5.42
P	T2	BSP	5.38
P	T2	BSP	2.39
P	T2	BSP	6.35
P	T2	BSP	5.71
P	T2	BSP	4.04
P	T2	BSP	1.6
P	T2	BSP	1.89
P	T2	BSP	2.04
P	T2	BSP	2.38
P	T3	JN24	4.41
P	T3	JN24	4.54
P	T3	JN24	4.88
P	T3	JN24	2.51
P	T3	JN24	2.35
P	T3	JN24	1.99
P	T3	JN24	1.72
P	T3	JN24	1.21
P	T3	JN24	2.45
P	T3	JN24	4.25
P	T4	JLB4	7.3
P	T4	JLB4	6.94
P	T4	JLB4	4.03
P	T4	JLB4	4.38
P	T4	JLB4	3.95
P	T4	JLB4	4.2
P	T4	JLB4	7.23
P	T4	JLB4	6.72
P	T4	JLB4	4.53
P	T4	JLB4	3.88
PRock	T5	n/s	4.2
PRock	T5	n/s	3.65
PRock	T5	n/s	2.84
PRock	T5	n/s	3.39
PRock	T5	n/s	3.74
PRock	T5	n/s	4.83
PRock	T5	n/s	5.5
PRock	T5	n/s	5.16
PRock	T5	n/s	3.36
PRock	T5	n/s	2.4
PRock	T6	BSP	4.37
PRock	T6	BSP	5
PRock	T6	BSP	2.86
PRock	T6	BSP	2.98
PRock	T6	BSP	4.13
PRock	T6	BSP	3.16
PRock	T6	BSP	2.92
PRock	T6	BSP	4.5
PRock	T6	BSP	1.21
PRock	T6	BSP	1.72
PRock	T7	JN24	4.22
PRock	T7	JN24	3.57
PRock	T7	JN24	2.89
PRock	T7	JN24	2.97
PRock	T7	JN24	4.57
PRock	T7	JN24	2.66
PRock	T7	JN24	2.39
PRock	T7	JN24	4.36
PRock	T7	JN24	4.57
PRock	T7	JN24	2.89
PRock	T8	JLB4	4.47
PRock	T8	JLB4	3.01
PRock	T8	JLB4	3.57
PRock	T8	JLB4	5.22
PRock	T8	JLB4	2.53
PRock	T8	JLB4	2.87
PRock	T8	JLB4	3.59
PRock	T8	JLB4	1.98
PRock	T8	JLB4	5.12
PRock	T8	JLB4	4.67

## Sheet: Root volume
Psource	Treatment	Strain	Y
P	T1	n/s	14
P	T1	n/s	7
P	T1	n/s	12
P	T1	n/s	9
P	T1	n/s	8
P	T1	n/s	10
P	T2	BSP	6
P	T2	BSP	7
P	T2	BSP	4
P	T2	BSP	5
P	T2	BSP	6
P	T2	BSP	7
P	T3	JN24	6
P	T3	JN24	5
P	T3	JN24	8
P	T3	JN24	4
P	T3	JN24	7
P	T3	JN24	5
P	T4	JLB4	12
P	T4	JLB4	12
P	T4	JLB4	12
P	T4	JLB4	16
P	T4	JLB4	11
P	T4	JLB4	12.6
PRock	T5	n/s	9
PRock	T5	n/s	9
PRock	T5	n/s	11
PRock	T5	n/s	10
PRock	T5	n/s	12
PRock	T5	n/s	9
PRock	T6	BSP	6
PRock	T6	BSP	11
PRock	T6	BSP	9
PRock	T6	BSP	11
PRock	T6	BSP	11
PRock	T6	BSP	9.6
PRock	T7	JN24	8
PRock	T7	JN24	10
PRock	T7	JN24	7
PRock	T7	JN24	10
PRock	T7	JN24	8.75
PRock	T7	JN24	8.75
PRock	T8	JLB4	8
PRock	T8	JLB4	14
PRock	T8	JLB4	10
PRock	T8	JLB4	8
PRock	T8	JLB4	8
PRock	T8	JLB4	10

[truncated: 3 more sheets: Dry root biomass, Root length, Nutrients]
